# Supplementary material
Source: PubMed Central journal article supplement (PMC2752569)
Supplement: 0904143106_0904143106SI.pdf [file 0904143106_0904143106SI.pdf]

# Supporting Information

de Kock and Sakmann 10.1073/pnas.0904143106

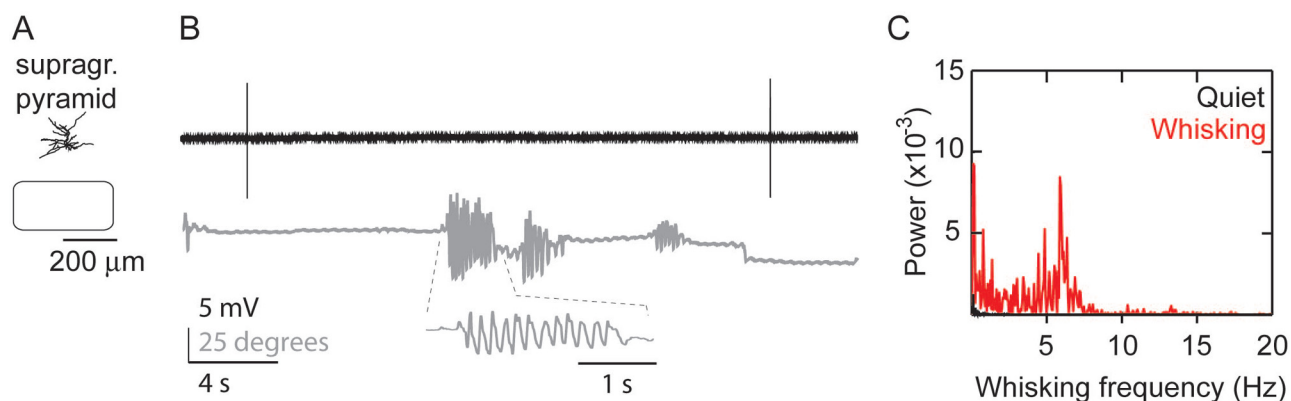

**Fig. S1.** Spiking frequency in primary somatosensory cortex is typically low and does not correlate to whisker movement. (A) Neurolucida reconstruction of supragranular pyramidal neuron in coronal view (contour represents B1 barrel). (B) Action potential spiking (band-pass filtered from 300–9,000 Hz) and whisker tracking during juxtасomal recording of same supragranular pyramidal neuron in primary somatosensory cortex. (C) Power spectrum for quiet and whisking episodes.

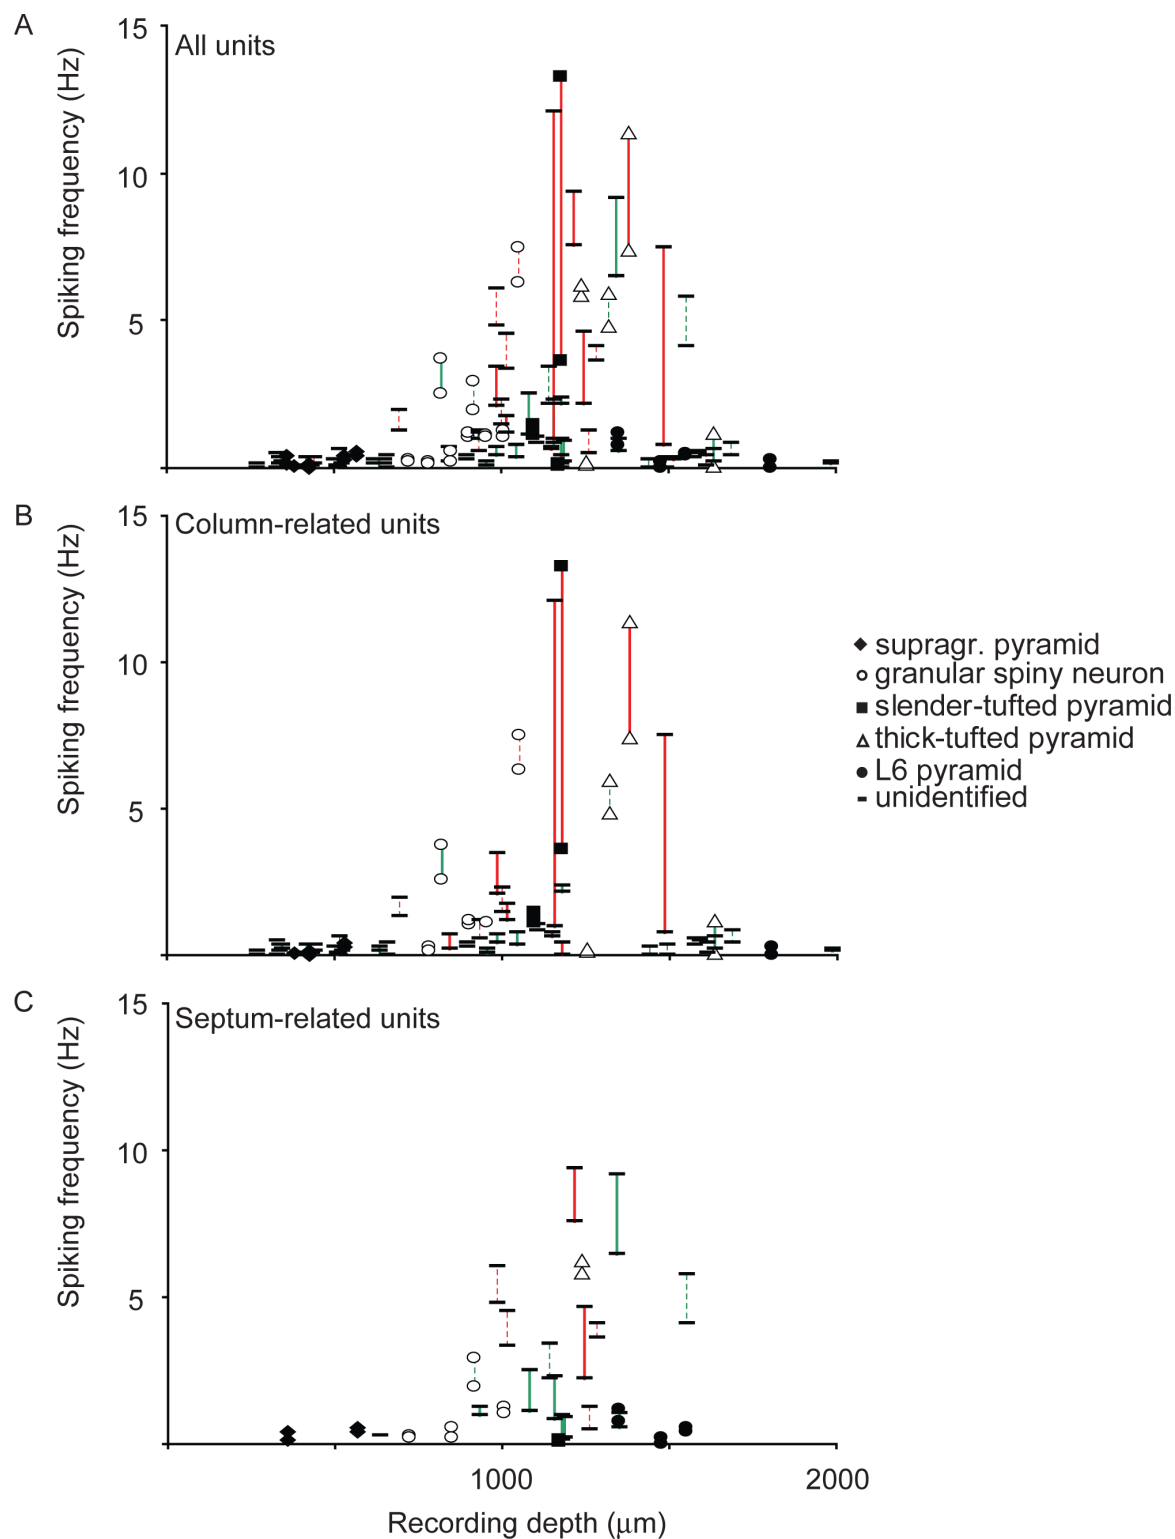

**Fig. S2.** Change in spiking frequency is observed in both septal and column related neurons. (A) Correlation of spiking frequency during quiet and whisking episodes with respect to recording depth (see Fig. 2C). In B and C, units were subcategorized in either column-related (B) or septum-related (C) units, respectively. Barrel or septal location of unidentified neurons was determined by using location of identified neurons on same electrode track.



**Table S1. Spiking frequencies (avg  $\pm$  SD in Hz) with number of observations in parentheses and recording depth [avg  $\pm$  SD in  $\mu\text{m}$ ] in brackets**

| Neurons                 | Urethane                                 | Awake quiet identified | Awake whisking identified | Awake quiet all units                    | Awake whisking all units |
|-------------------------|------------------------------------------|------------------------|---------------------------|------------------------------------------|--------------------------|
| Supragranular pyramids  | 0.39 $\pm$ 0.56 (22)<br>[393 $\pm$ 109]  | 0.31 $\pm$ 0.21 (5)    | 0.18 $\pm$ 0.16 (5)       | 0.28 $\pm$ 0.28 (23)<br>[466 $\pm$ 116]  | 0.22 $\pm$ 0.40 (22)     |
| Granular spiny neurons  | 0.58 $\pm$ 0.36 (15)<br>[834 $\pm$ 116]  | 1.93 $\pm$ 2.02 (9)    | 1.77 $\pm$ 2.29 (9)       | 1.35 $\pm$ 1.72 (15)<br>[899 $\pm$ 85]   | 1.36 $\pm$ 1.90 (14)     |
| Slender-tufted pyramids | 1.08 $\pm$ 0.38 (16)<br>[1126 $\pm$ 116] | 1.62 $\pm$ 1.81 (3)    | 4.94 $\pm$ 7.22 (3)       | 1.88 $\pm$ 1.71 (25)<br>[1122 $\pm$ 88]  | 3.04 $\pm$ 3.77 (23)     |
| Thick-tufted pyramids   | 3.27 $\pm$ 1.63 (23)<br>[1238 $\pm$ 76]  | 4.12 $\pm$ 3.22 (5)    | 4.53 $\pm$ 4.84 (5)       | 2.93 $\pm$ 3.08 (15)<br>[1415 $\pm$ 120] | 3.52 $\pm$ 3.68 (13)     |
| L6                      | 0.47 $\pm$ 0.46 (15)<br>[1537 $\pm$ 102] | 0.52 $\pm$ 0.47 (4)    | 0.32 $\pm$ 0.38 (4)       | 0.47 $\pm$ 0.35 (10)<br>[1627 $\pm$ 174] | 0.34 $\pm$ 0.24 (10)     |

Unidentified neurons were categorized based on recording depth, taking into account the depth of layers as determined by de Kock et al. [de Kock CP, Bruno RM, Spors H, Sakmann B (2007) Layer and cell type specific suprathreshold stimulus representation in primary somatosensory cortex. *J Physiol* 581:139–154].
